# Supplementary material for: Nucleotide inhibition of the pancreatic ATP-sensitive K+ channel explored with patch-clamp fluorometry
Source: eLife journal article supplement (doi:10.7554/elife.52775), 2020-01-07
Supplement: supp [file elife-52775-supp-v1.zip]

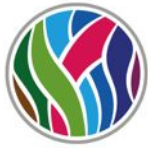

## eLife's transparent reporting form

We encourage authors to provide detailed information *within their submission* to facilitate the interpretation and replication of experiments. Authors can upload supporting documentation to indicate the use of appropriate reporting guidelines for health-related research (see [EQUATOR Network](#)), life science research (see the [BioSharing Information Resource](#)), or the [ARRIVE guidelines](#) for reporting work involving animal research. Where applicable, authors should refer to any relevant reporting standards documents in this form.

If you have any questions, please consult our Journal Policies and/or contact us: [editorial@elifesciences.org](mailto:editorial@elifesciences.org).

### Sample-size estimation

- You should state whether an appropriate sample size was computed when the study was being designed
- You should state the statistical method of sample size computation and any required assumptions
- If no explicit power analysis was used, you should describe how you decided what sample (replicate) size (number) to use

Please outline where this information can be found within the submission (e.g., sections or figure legends), or explain why this information doesn't apply to your submission:

We did not conduct a power analysis as we had no expectations before our experiments of what effects we might see or how big they might be. As we saw relatively low variability in our PCF experiments, we concluded that sample sizes of 5 - 10 would be sufficient. For unroofed membrane experiments, we used higher sample sizes of 10-20 as our preliminary results suggested that effect sizes might be small.

### Replicates

- You should report how often each experiment was performed
- You should include a definition of biological versus technical replication
- The data obtained should be provided and sufficient information should be provided to indicate the number of independent biological and/or technical replicates
- If you encountered any outliers, you should describe how these were handled
- Criteria for exclusion/inclusion of data should be clearly stated
- High-throughput sequence data should be uploaded before submission, with a private link for reviewers provided (these are available from both GEO and ArrayExpress)

Please outline where this information can be found within the submission (e.g., sections or figure legends), or explain why this information doesn't apply to your submission:

Number of replications for each experiment are indicated in their respective figure legends. Additionally, the number of replications for electrophysiology and fluorescence quenching experiments are also summarised in Tables 1-3. The definition of a replicate is described in the figure legends. Outliers were not discarded. We have added some additional sentences in the Materials and Methods section to describe exclusion criteria for data (lines 631-633 & 643-644).

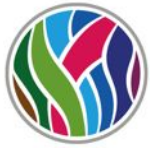

### Statistical reporting

- Statistical analysis methods should be described and justified
- Raw data should be presented in figures whenever informative to do so (typically when N per group is less than 10)
- For each experiment, you should identify the statistical tests used, exact values of N, definitions of center, methods of multiple test correction, and dispersion and precision measures (e.g., mean, median, SD, SEM, confidence intervals; and, for the major substantive results, a measure of effect size (e.g., Pearson's  $r$ , Cohen's  $d$ )
- Report exact p-values wherever possible alongside the summary statistics and 95% confidence intervals. These should be reported for all key questions and not only when the p-value is less than 0.05.

Please outline where this information can be found within the submission (e.g., sections or figure legends), or explain why this information doesn't apply to your submission:

Statistical methods used in the manuscript are described in detail in Materials and Methods. Raw data are displayed in each figure. Summary statistics displayed in figures are indicated in figure legends where appropriate, as well as in the Materials and Methods (lines 651-653).

(For large datasets, or papers with a very large number of statistical tests, you may upload a single table file with tests, Ns, etc., with reference to sections in the manuscript.)

### Group allocation

- Indicate how samples were allocated into experimental groups (in the case of clinical studies, please specify allocation to treatment method); if randomization was used, please also state if restricted randomization was applied
- Indicate if masking was used during group allocation, data collection and/or data analysis

Please outline where this information can be found within the submission (e.g., sections or figure legends), or explain why this information doesn't apply to your submission:

No randomisation or masking was performed.

### Additional data files ("source data")

- We encourage you to upload relevant additional data files, such as numerical data that are represented as a graph in a figure, or as a summary table
- Where provided, these should be in the most useful format, and they can be uploaded as "Source data" files linked to a main figure or table
- Include model definition files including the full list of parameters used
- Include code used for data analysis (e.g., R, MatLab)
- Avoid stating that data files are "available upon request"

Please indicate the figures or tables for which source data files have been provided:

Datasets and code are available on GitHub ([https://github.com/smusher/KATP\\_paper\\_2019](https://github.com/smusher/KATP_paper_2019)) and we have also uploaded copies to Dryad ([https://datadryad.org/stash/share/LMUXziG\\_-oT8D1mbmf6iaXgUCNzwFWqdT6sUJUaFNzc](https://datadryad.org/stash/share/LMUXziG_-oT8D1mbmf6iaXgUCNzwFWqdT6sUJUaFNzc)), which is currently private for peer review.
