# Supplementary figures and images for: Nucleotide inhibition of the pancreatic ATP-sensitive K+ channel explored with patch-clamp fluorometry
Source: eLife journal article supplement (doi:10.7554/elife.52775), 2020-01-07

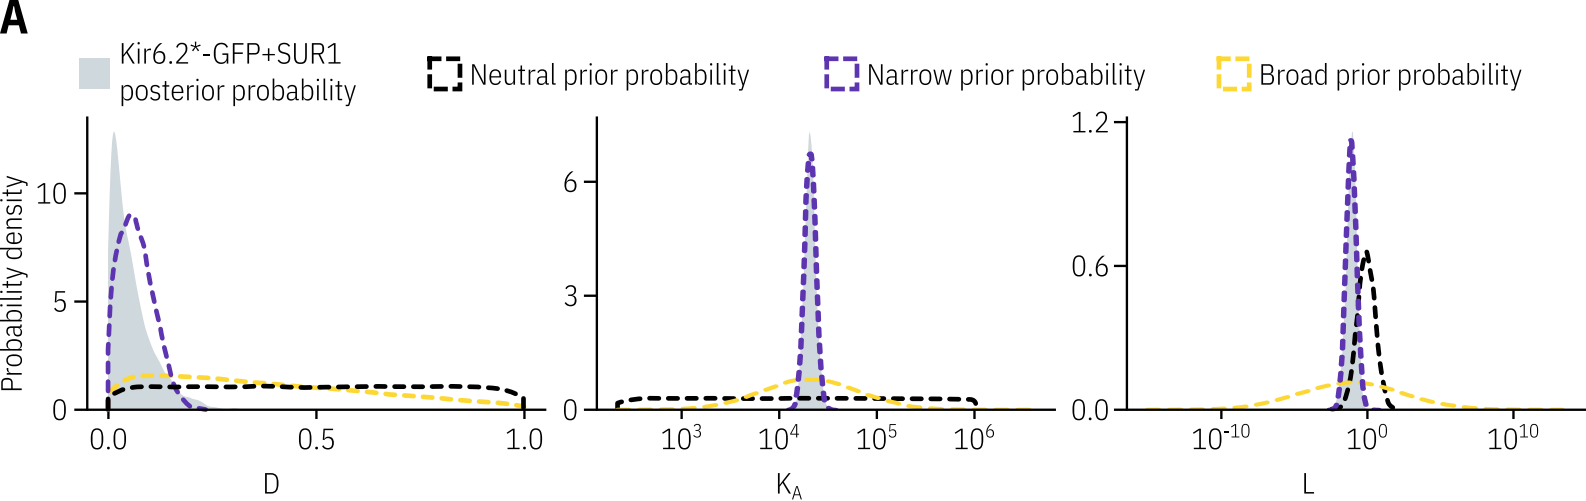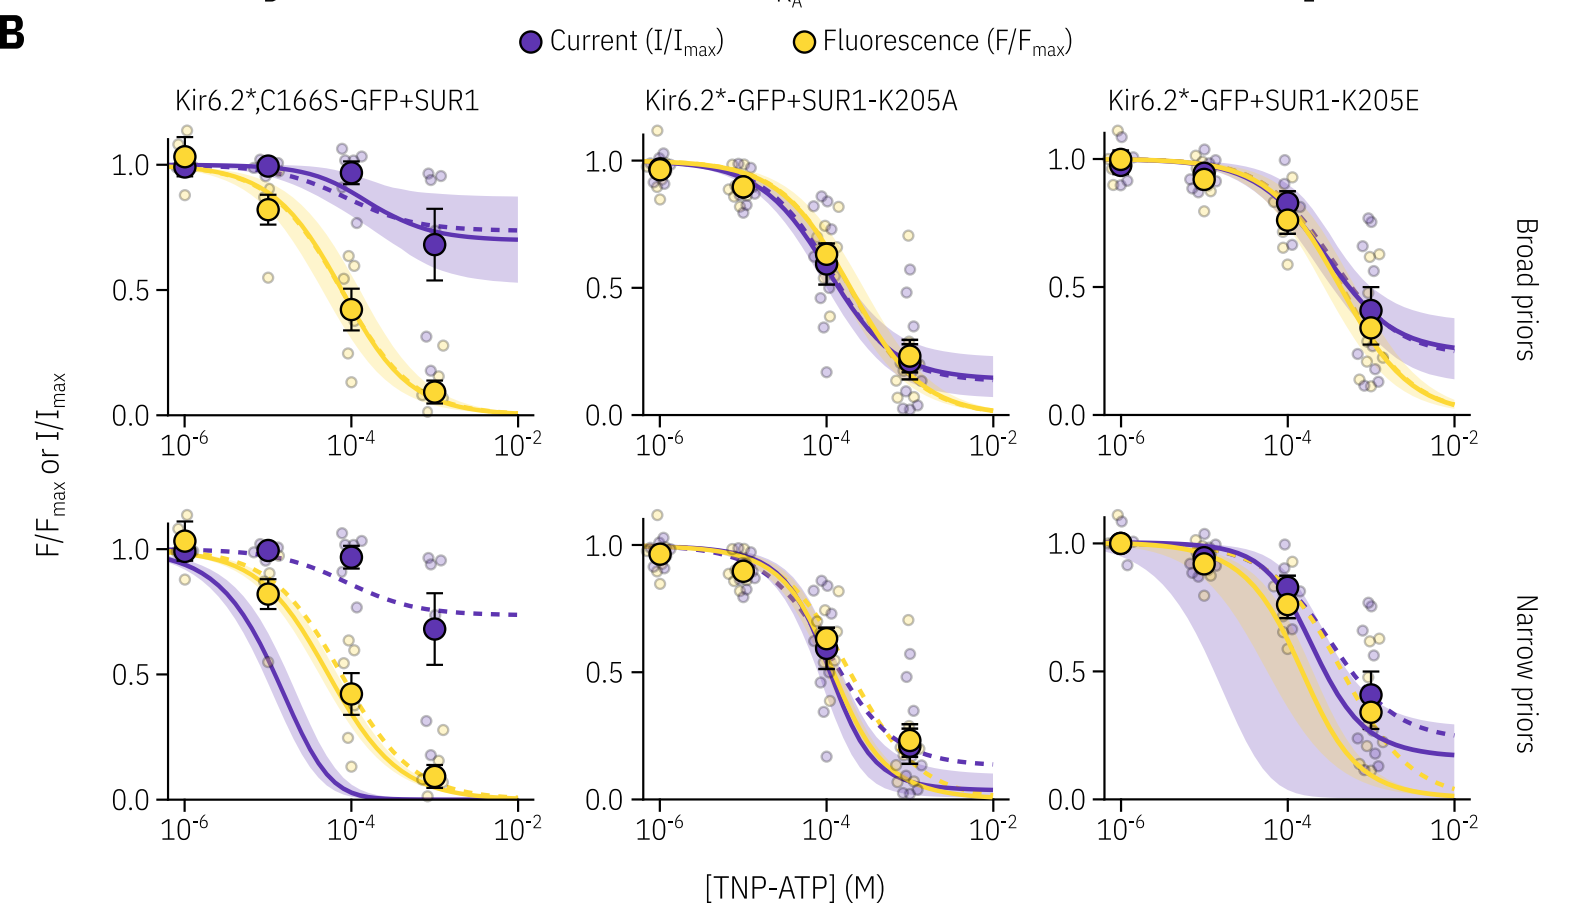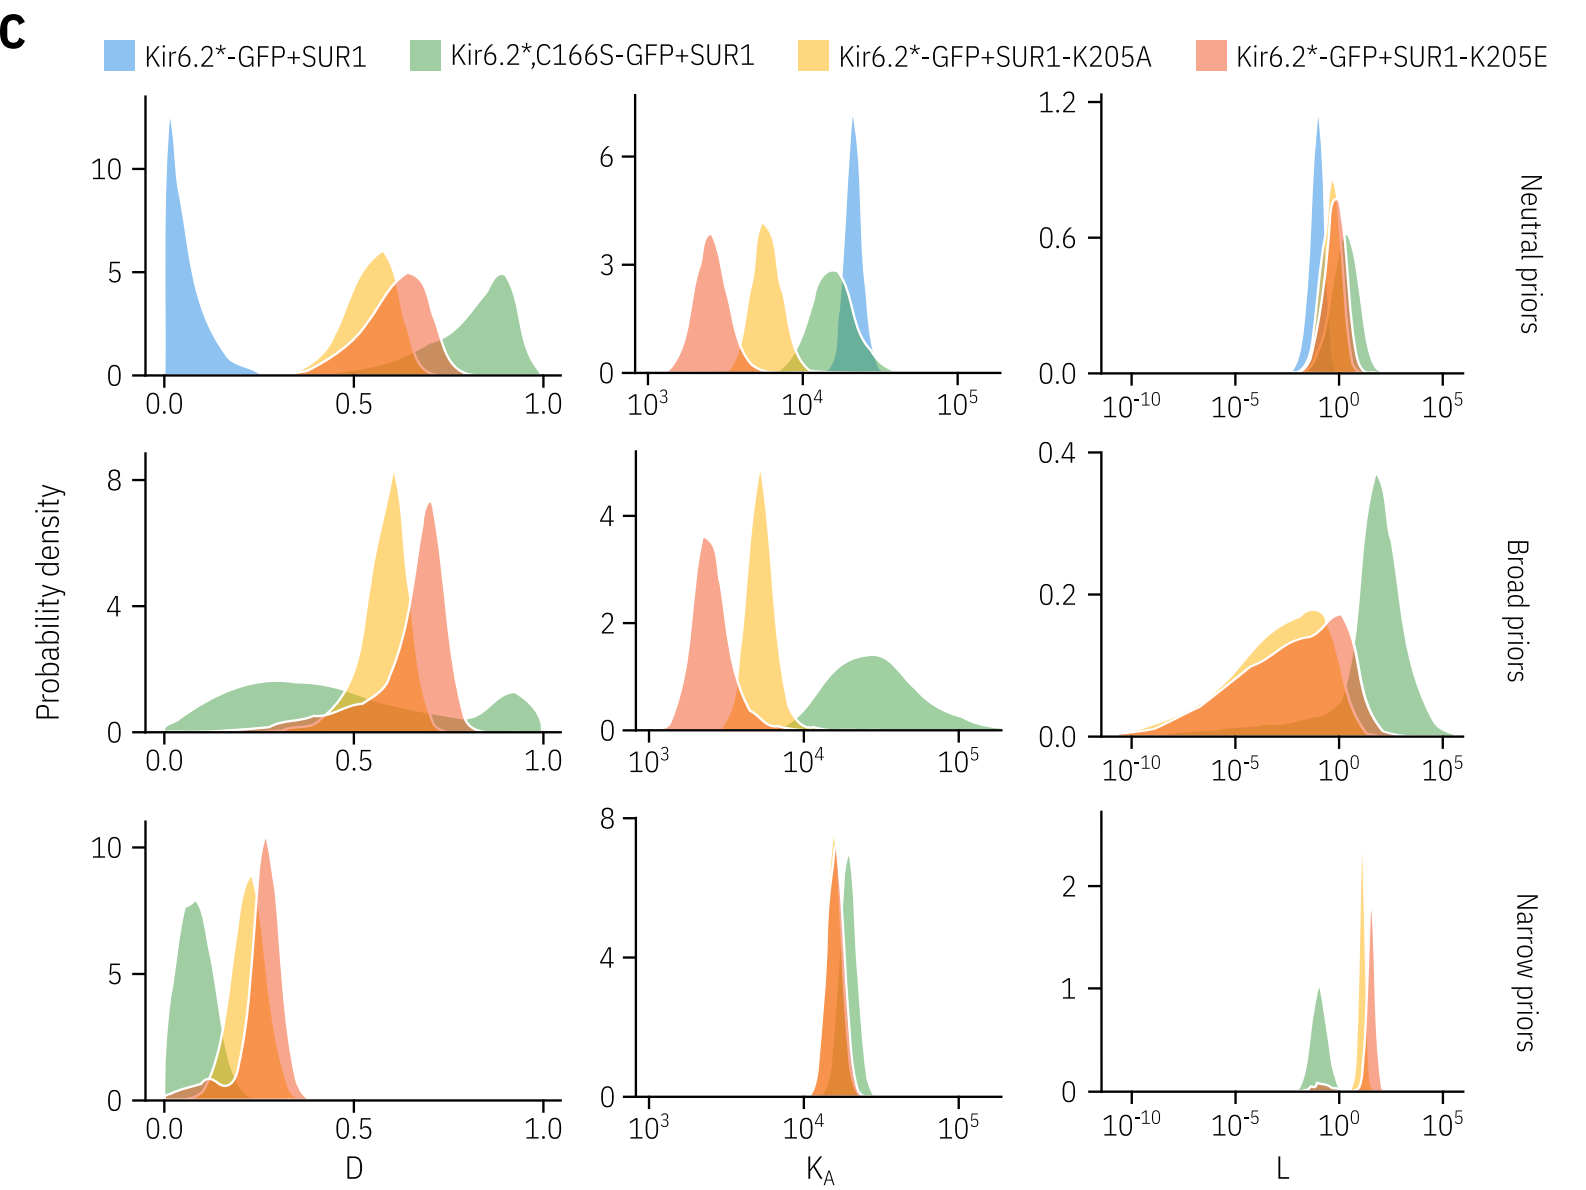

Supplement: supp [file elife-52775-supp-v1.zip]

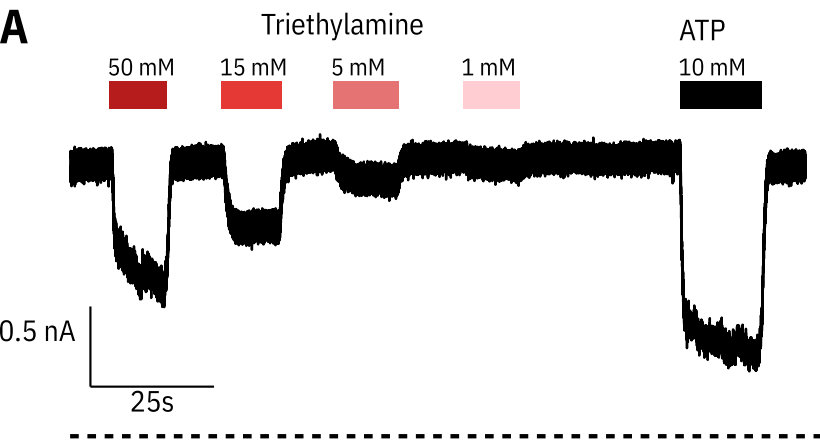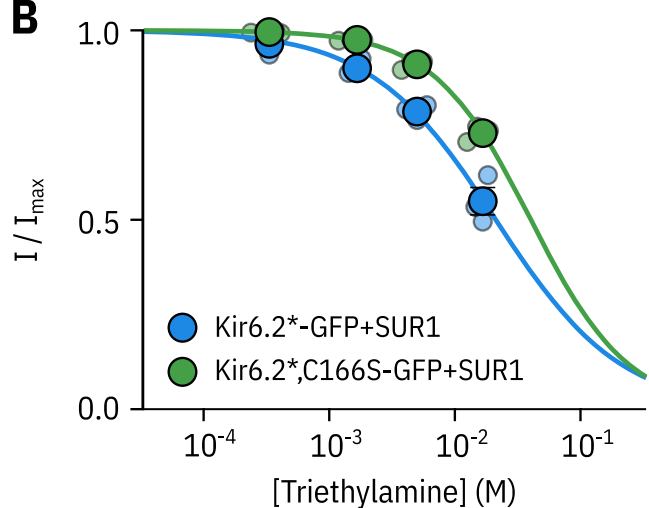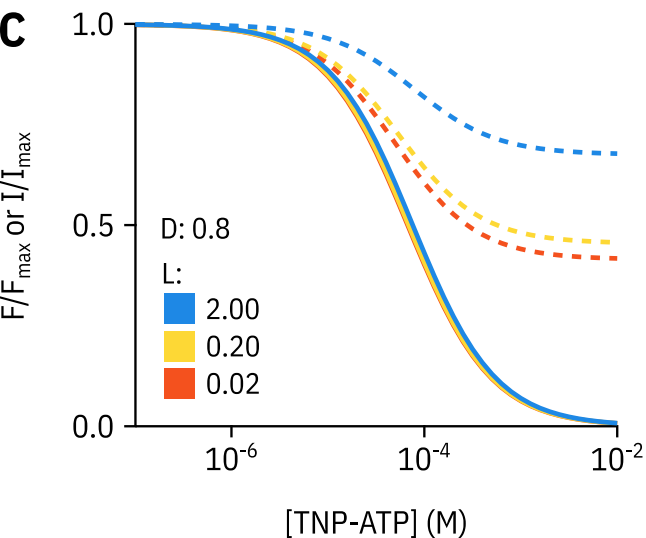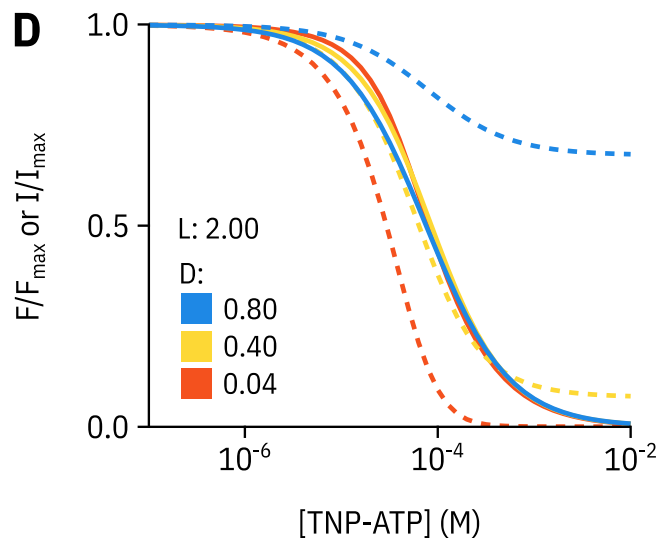

Supplement: supp [file elife-52775-supp-v1.zip]

**A**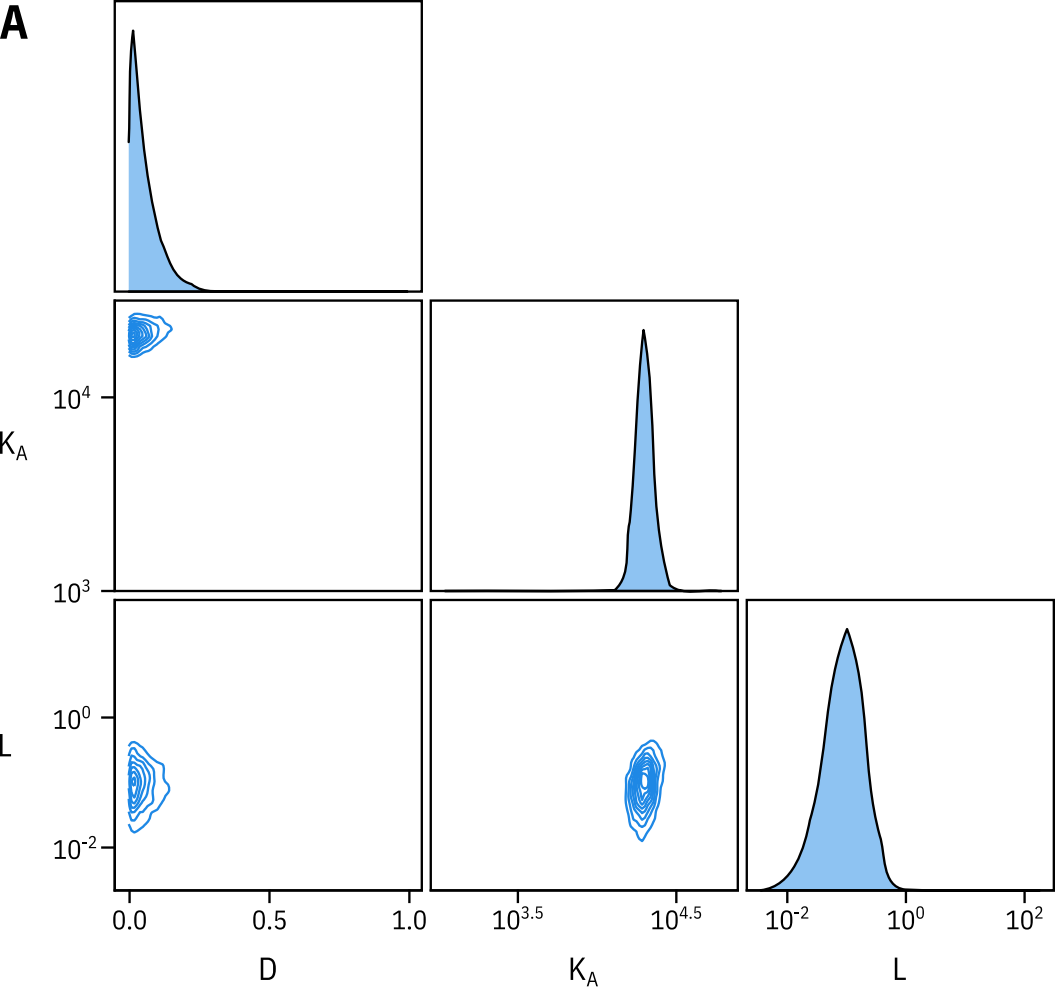**B**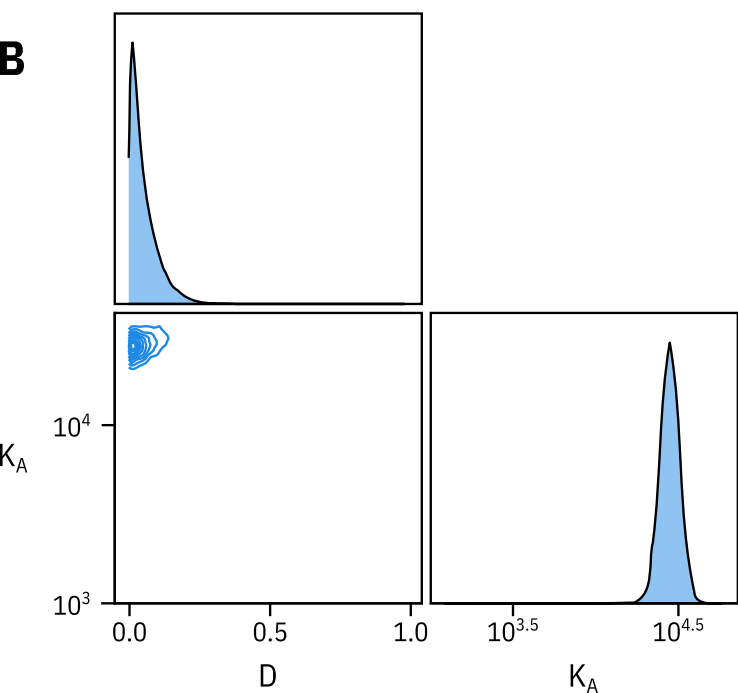

Supplement: supp [file elife-52775-supp-v1.zip]

**A**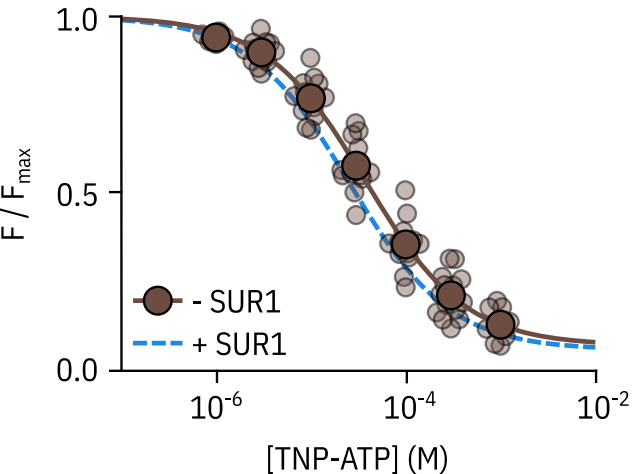**B**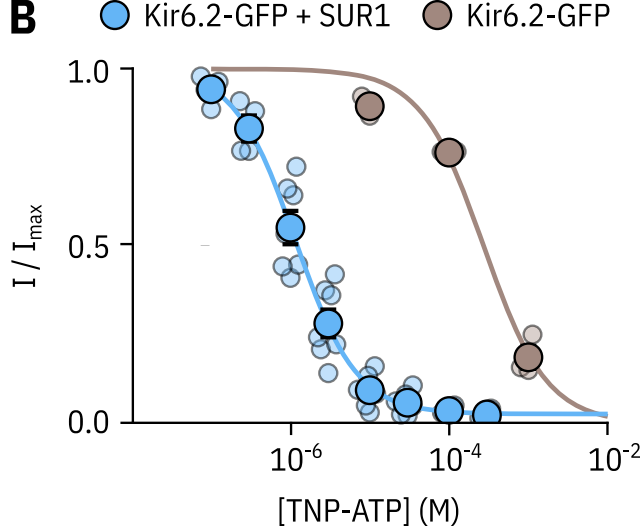

Supplement: supp [file elife-52775-supp-v1.zip]

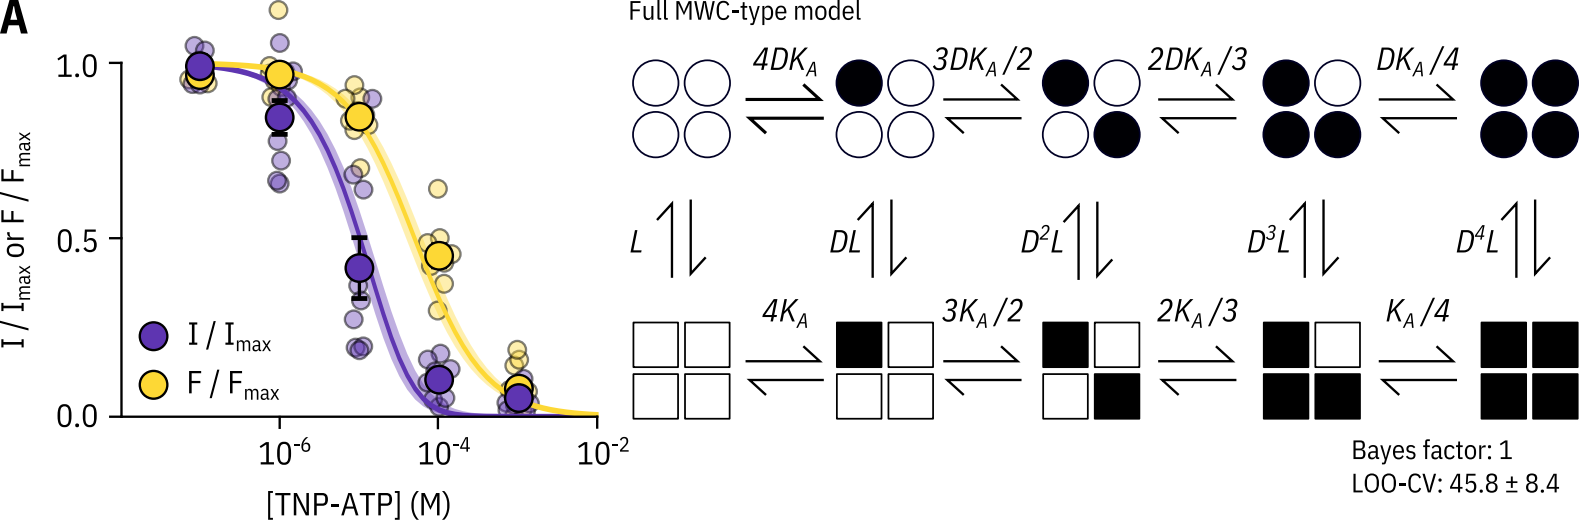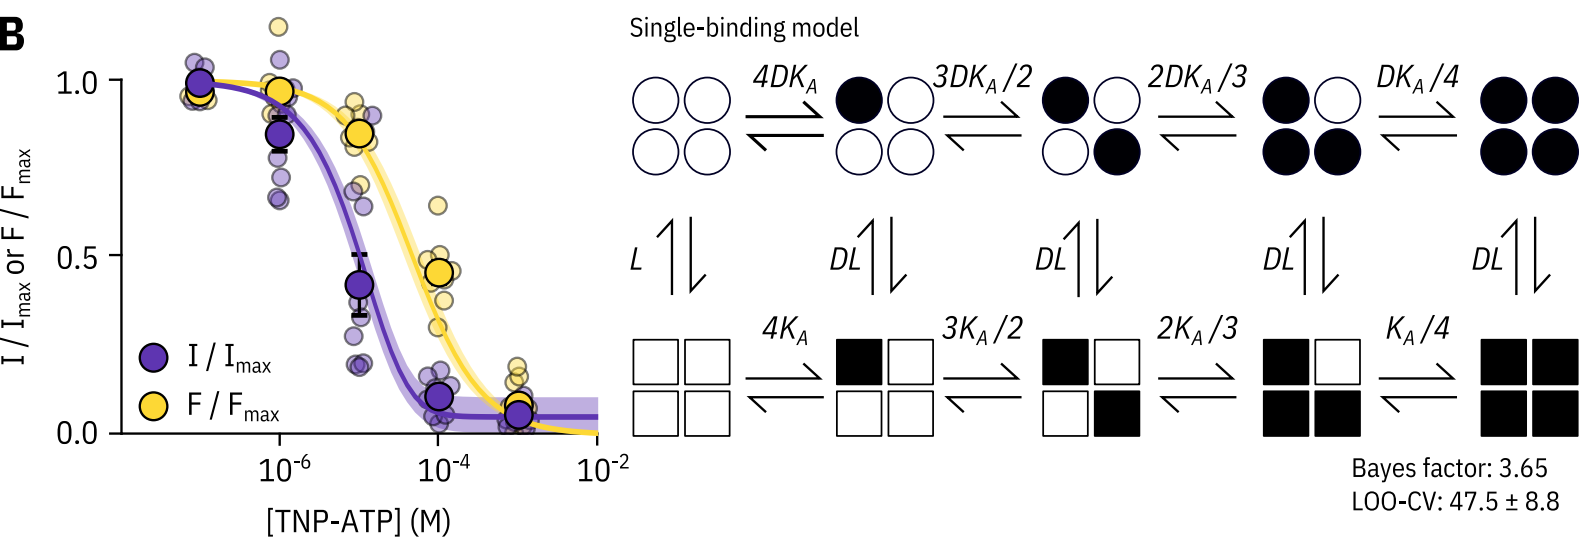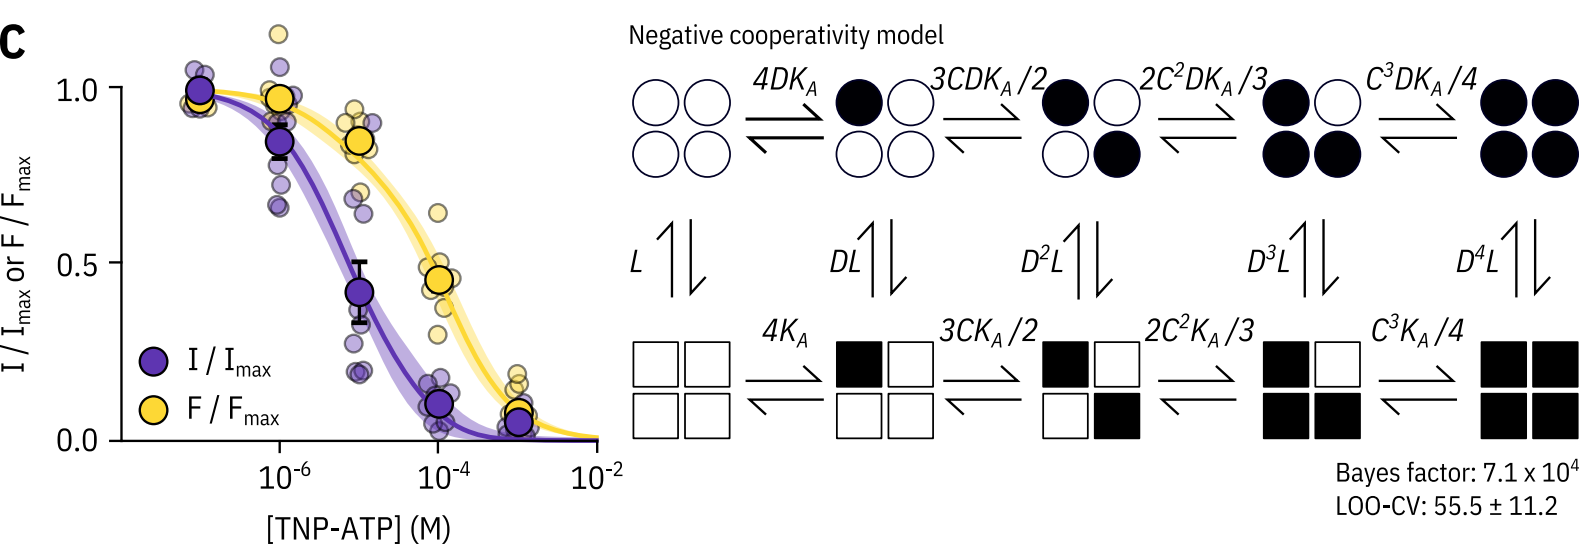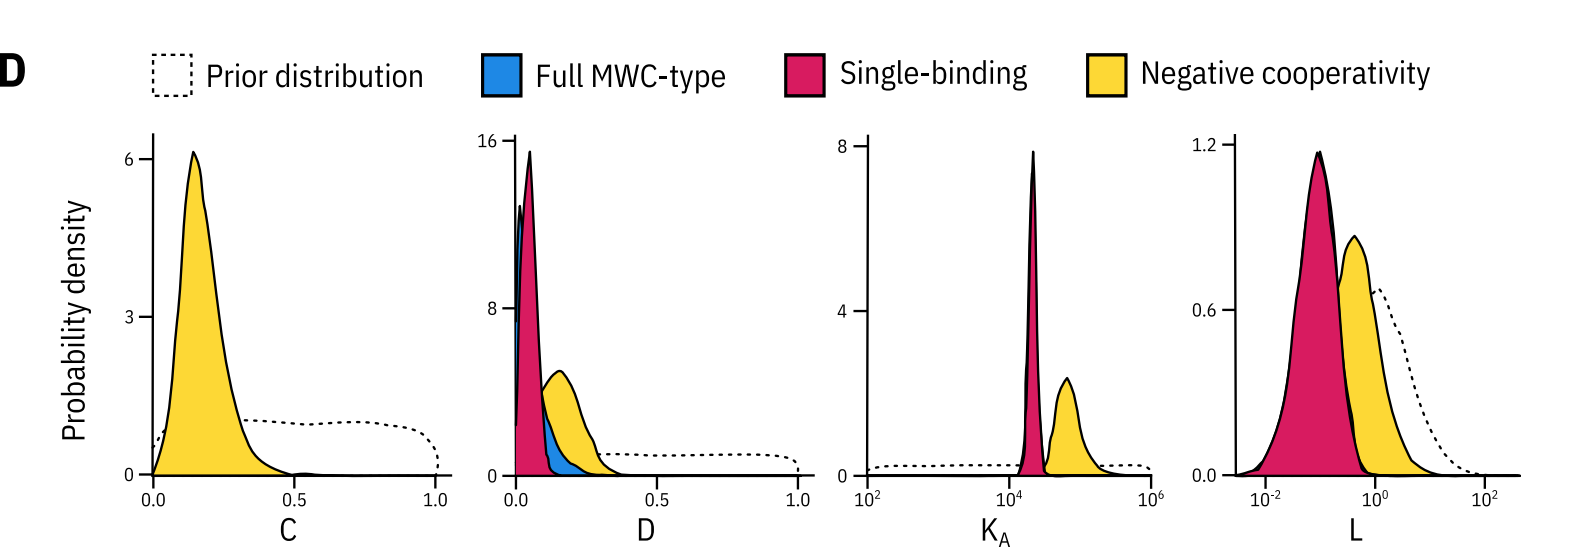

Supplement: supp [file elife-52775-supp-v1.zip]

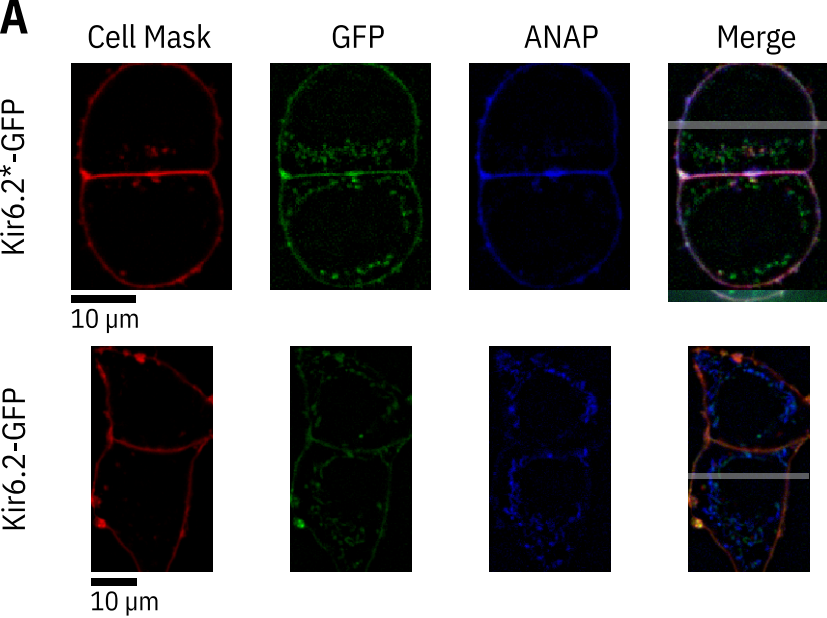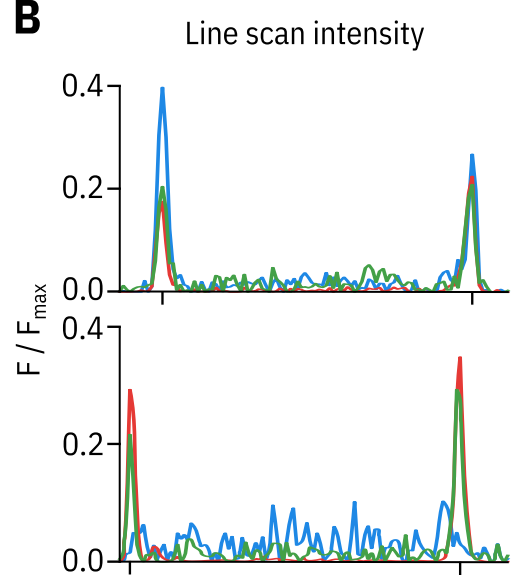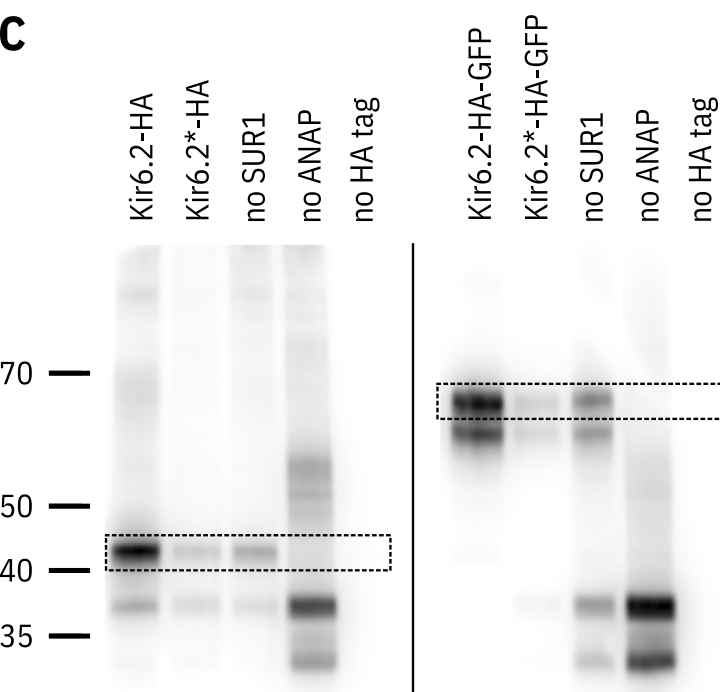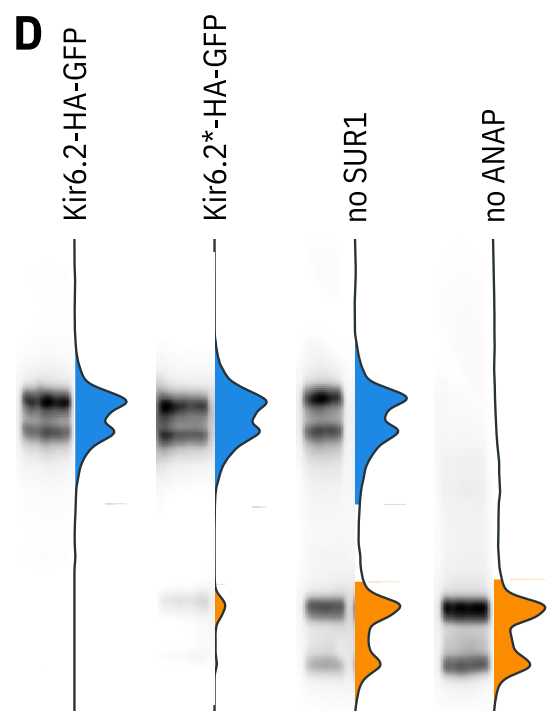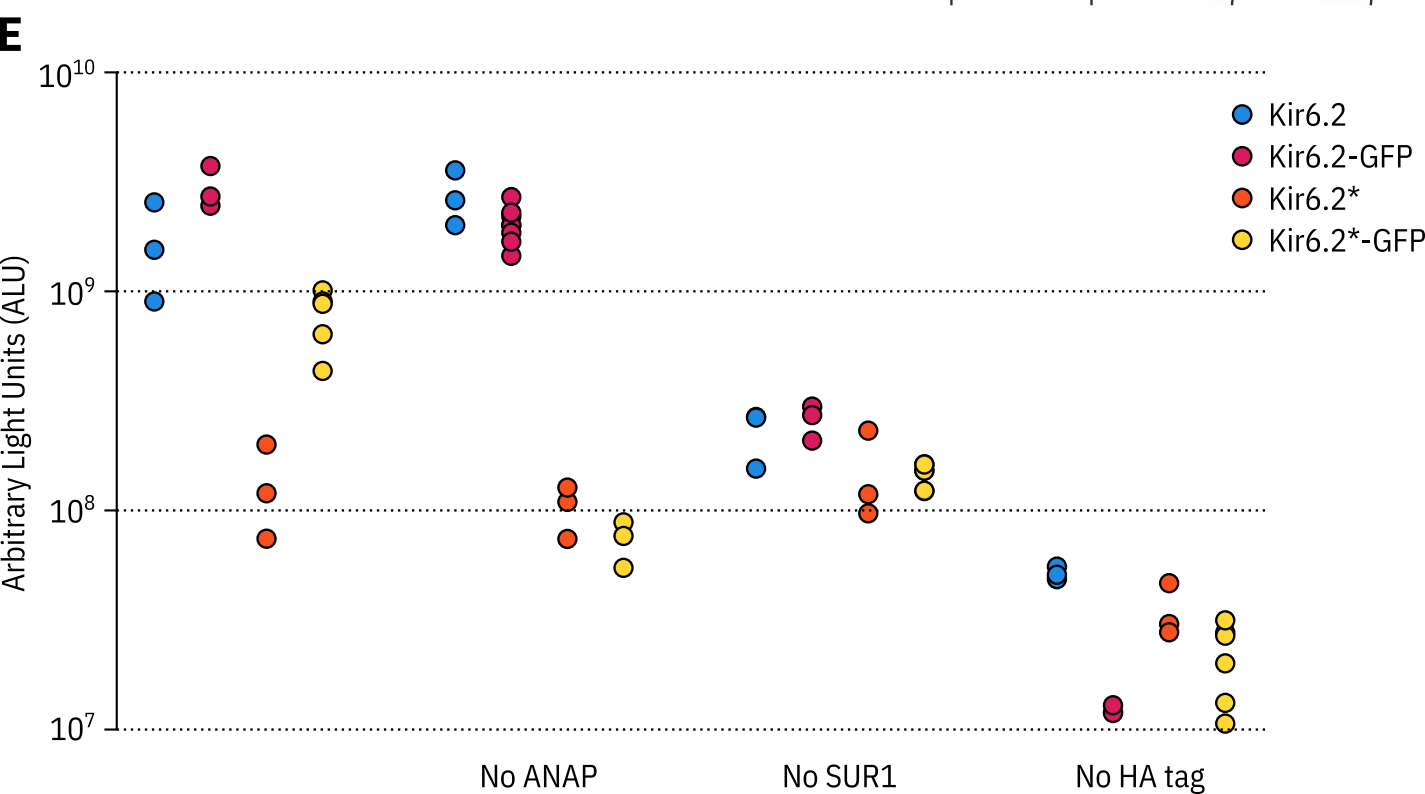

Supplement: supp [file elife-52775-supp-v1.zip]

**A**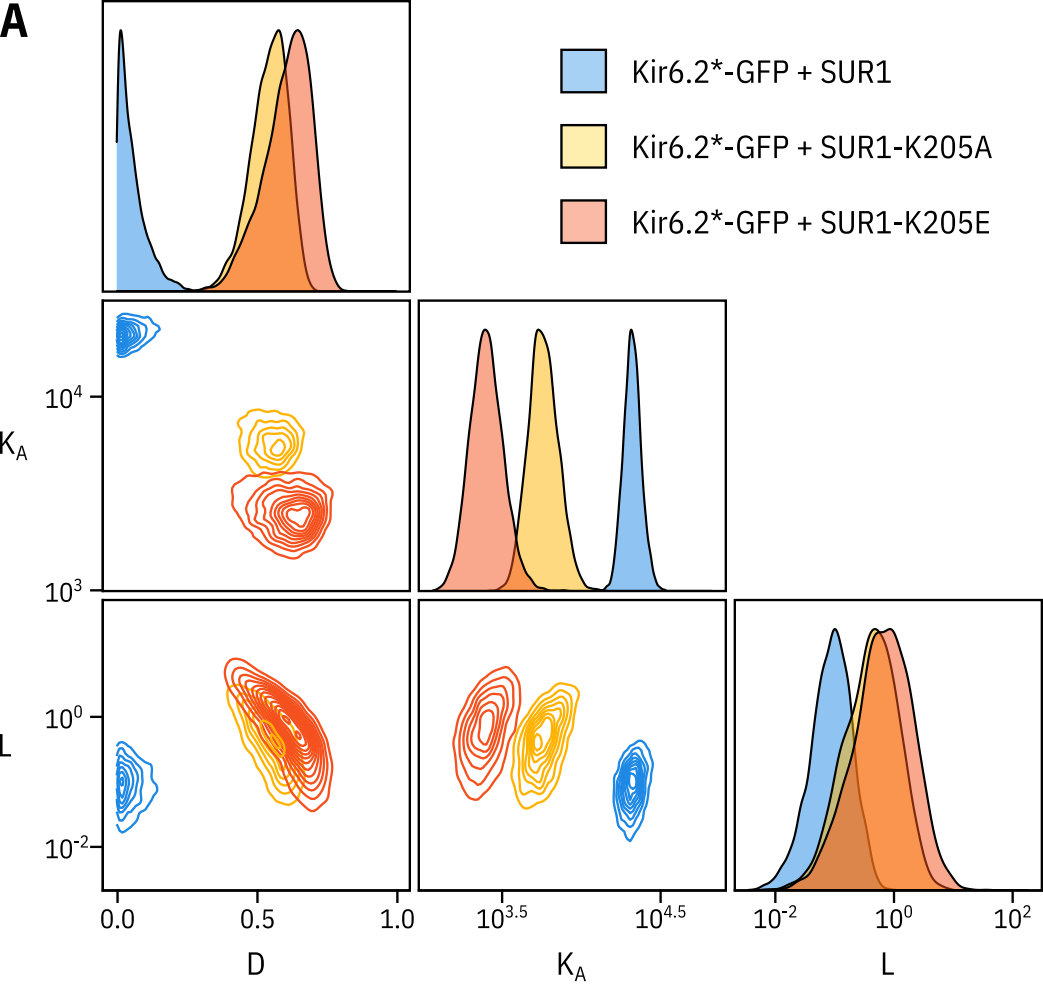**B**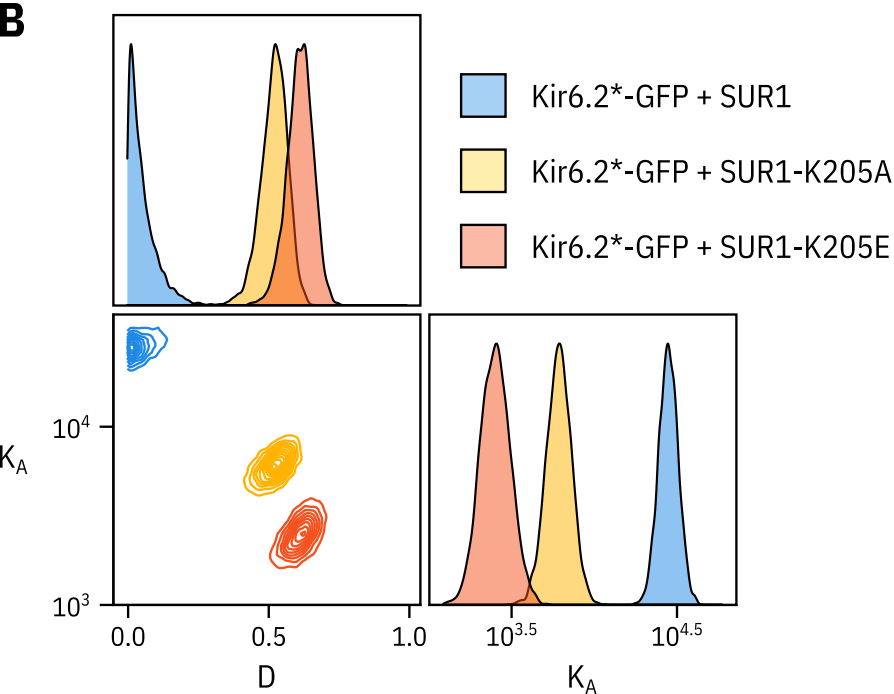

Supplement: supp [file elife-52775-supp-v1.zip]

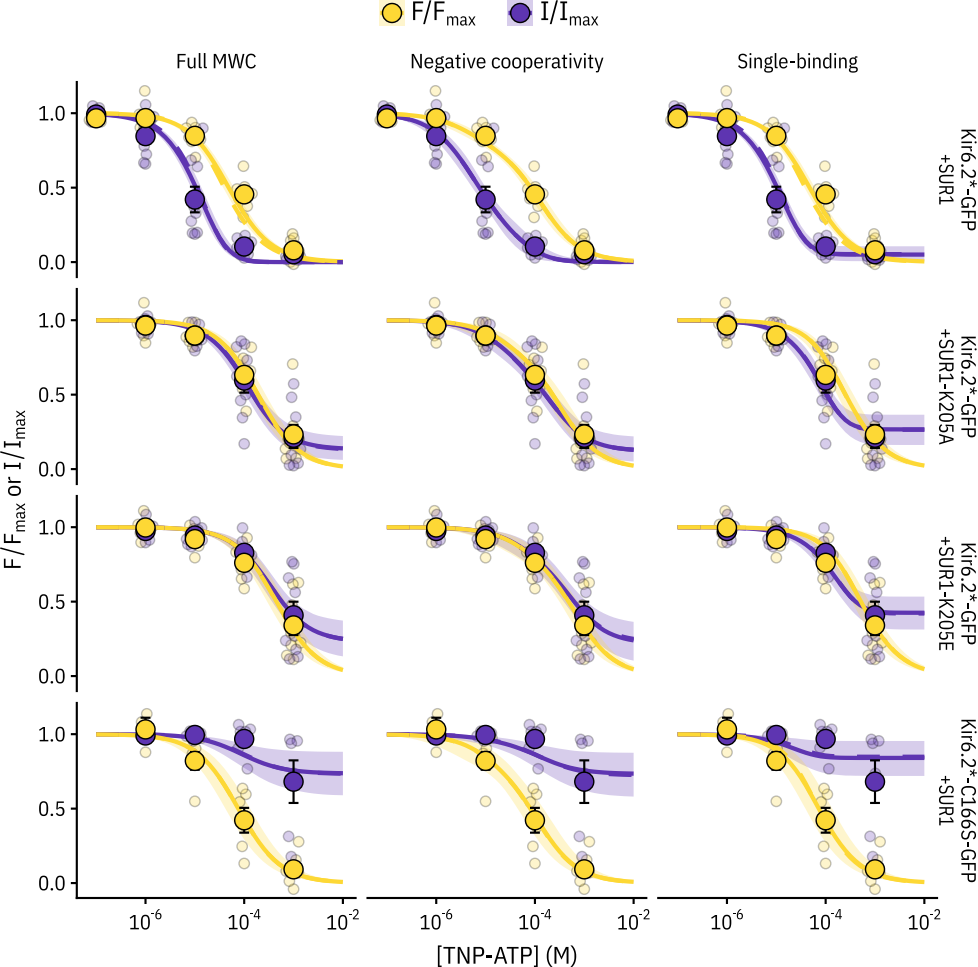

Supplement: supp [file elife-52775-supp-v1.zip]

**A**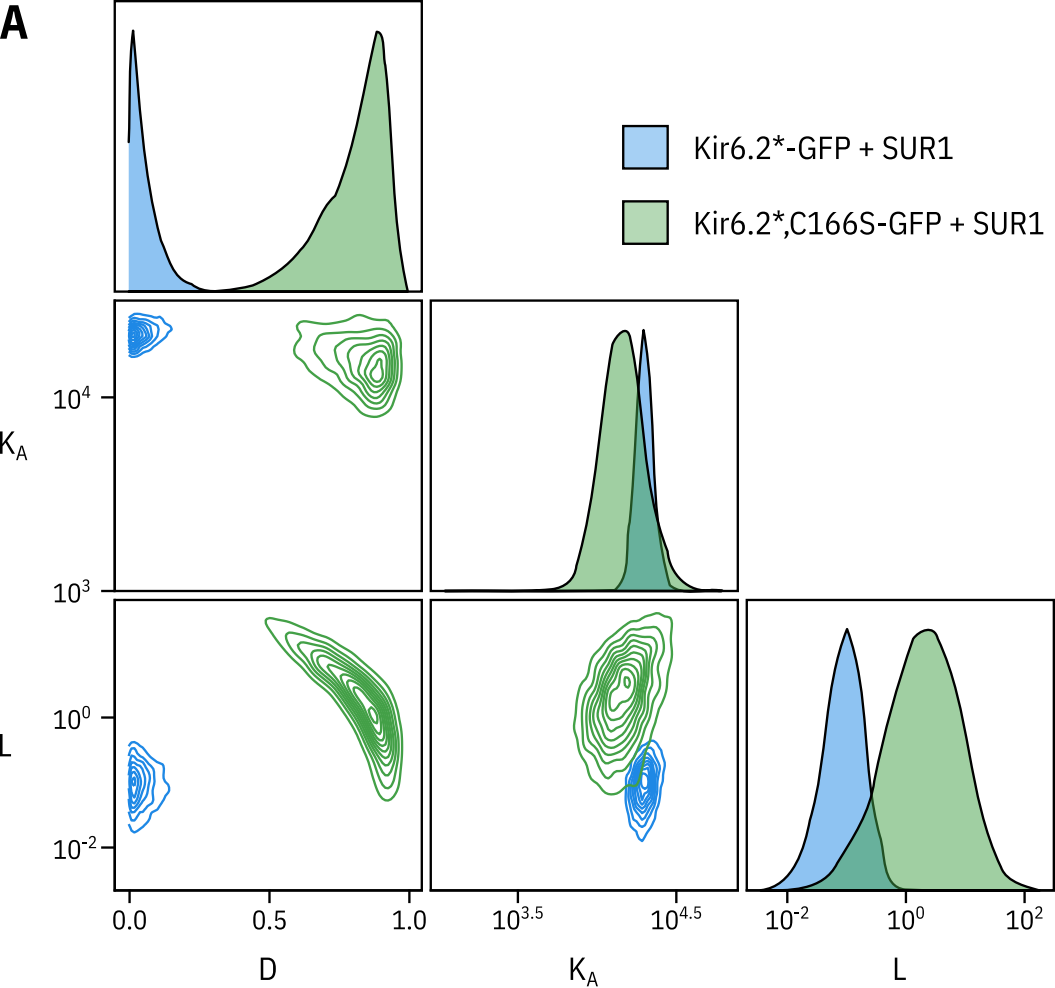**B**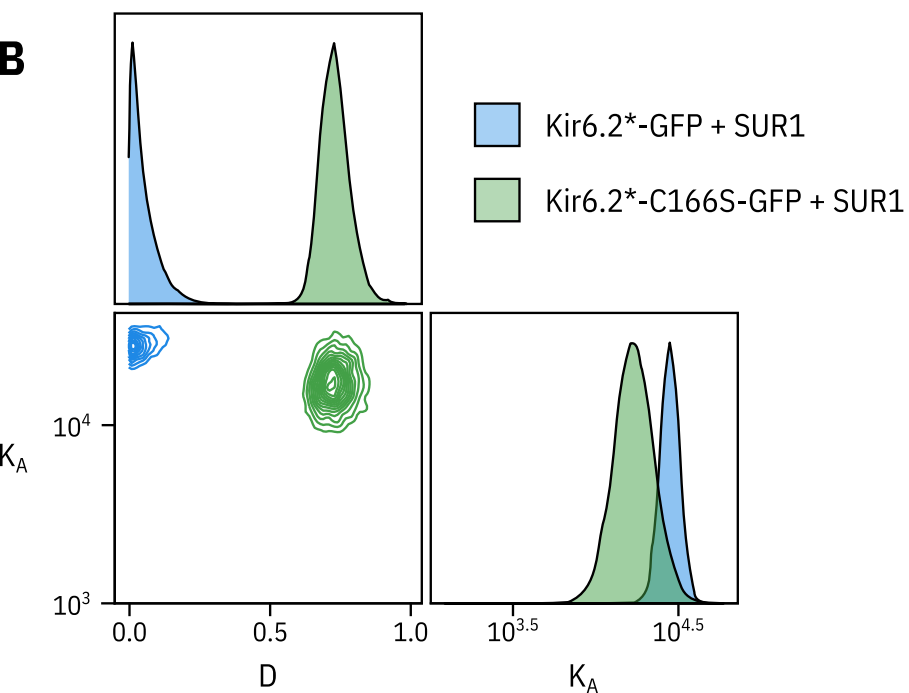

Supplement: supp [file elife-52775-supp-v1.zip]

**A**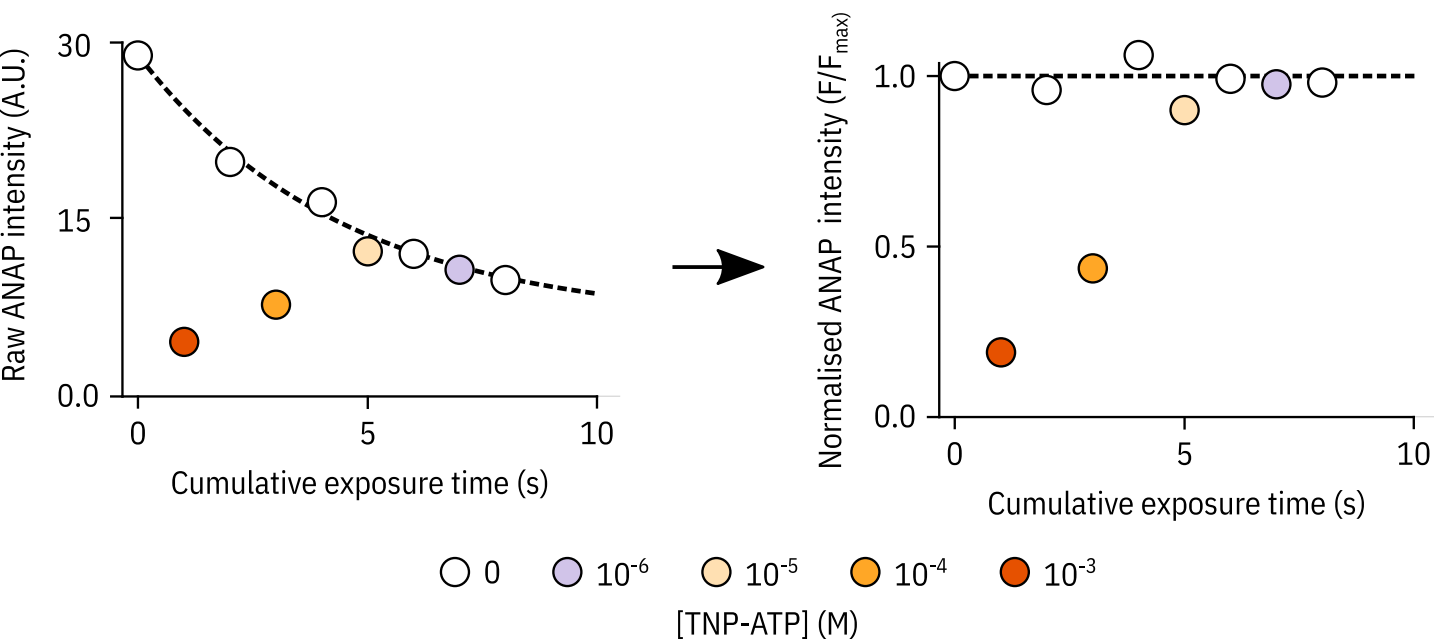**B**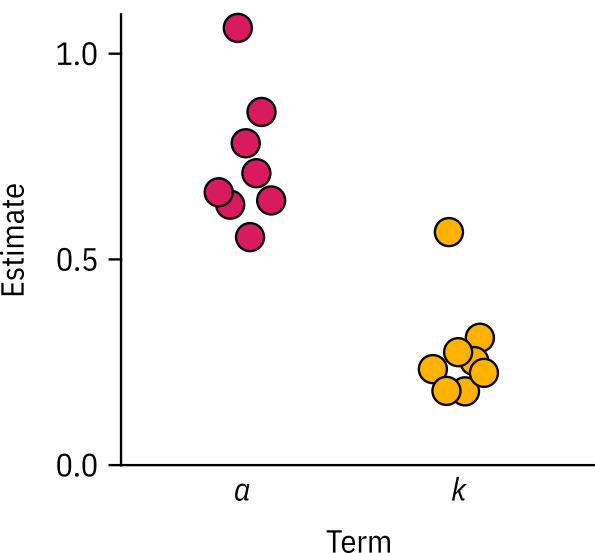**C**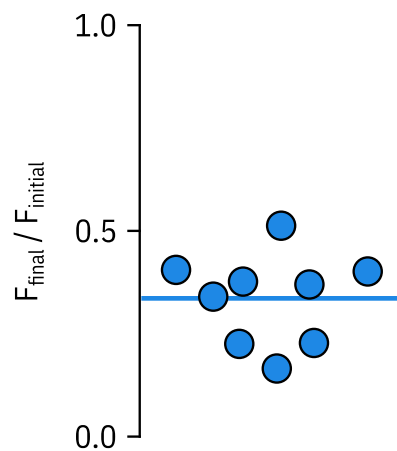

Supplement: supp [file elife-52775-supp-v1.zip]

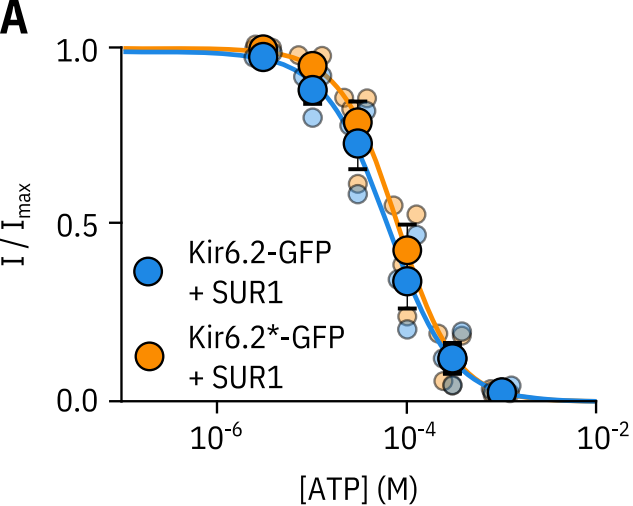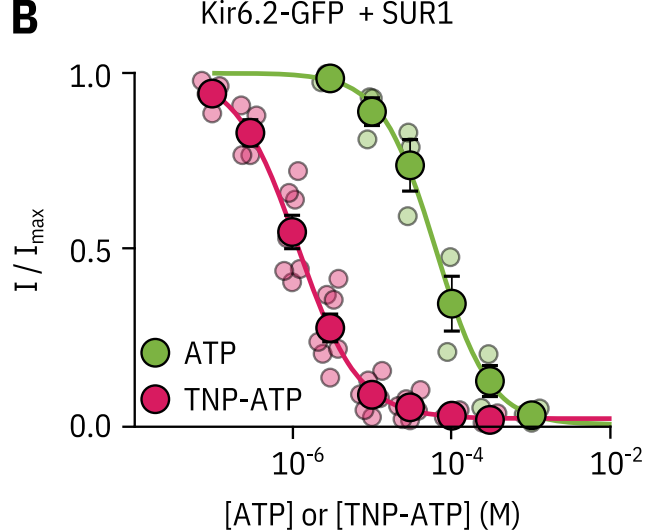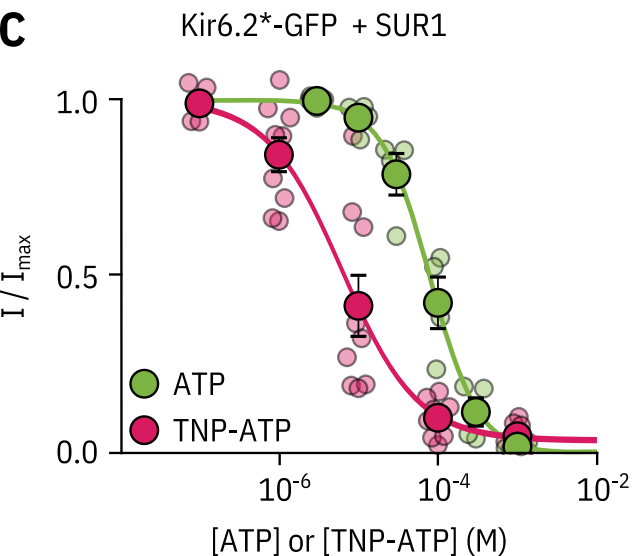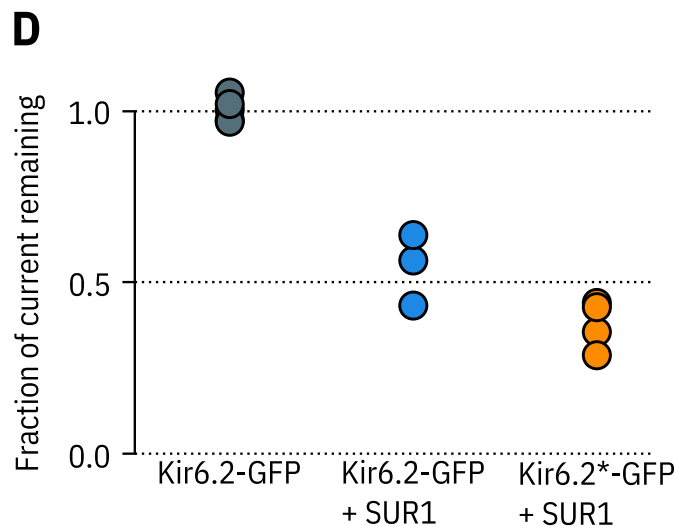

Supplement: supp [file elife-52775-supp-v1.zip]
